# Supplementary material for: The Lungfish Transcriptome: A Glimpse into Molecular Evolution Events at the Transition from Water to Land
Source: PubMed Central journal article supplement (PMC4764851; doi:10.1038/srep21571), 2016-02-24
Supplement: srep21571-s1.pdf [file srep21571-s1.pdf]

# **THE LUNGFISH TRANSCRIPTOME: A GLIMPSE INTO MOLECULAR EVOLUTION EVENTS AT THE TRANSITION FROM WATER TO LAND**

Biscotti Maria Assunta; Gerdol Marco; Canapa Adriana; Forconi Mariko; Olmo Ettore; Pallavicini Alberto; Barucca Marco; Scharl Manfred.

## **Supporting information**

7 supplementary tables, 10 supplementary figures.

**Supplementary Table S1: Lungfish tissues used for RNA-seq analysis.**

| Sample | Tissue | Sex | Specimen    | RIN | SRA accession |
|--------|--------|-----|-------------|-----|---------------|
| BM     | Brain  | ♂   | 1           | 7.9 | SRX1016233    |
| BF     | Brain  | ♀   | 5           | 8.1 | SRX1016234    |
| LM     | Liver  | ♂   | 1           | 7.4 | SRX1016235    |
| LF     | Liver  | ♀   | 5           | 8.7 | SRX1016236    |
| GM1    | Gonad  | ♂   | 1- immature | 9.0 | SRX1016237    |
| GM6    | Gonad  | ♂   | 6- mature   | 7.4 | SRX1016238    |
| GF2    | Gonad  | ♀   | 2           | 9.1 | SRX1016239    |
| GF3    | Gonad  | ♀   | 3           | 8.1 | SRX1016240    |
| GF4    | Gonad  | ♀   | 4           | 8.3 | SRX1016241    |

B=brain; L=liver; G=gonad; M=male; F=female. RIN=RNA Integrity Number of each sample subjected to RNA-seq. SRA=Sequence Read Archive. SRA and accession ID of the raw sequence data deposited at the NCBI database (BioProject: PRJNA164839).

**Supplementary Table S2: Trimming report.**

| <b>Trimming report</b>              | <b>BM</b>  | <b>BF</b>  | <b>LM</b>  | <b>LF</b>  | <b>GM1</b> | <b>GM6</b> | <b>GF2</b> | <b>GF3</b> | <b>GF4</b> | <b>Previous work<sup>3</sup></b> |
|-------------------------------------|------------|------------|------------|------------|------------|------------|------------|------------|------------|----------------------------------|
| Reads before trimming               | 74,994,854 | 78,970,734 | 72,700,274 | 81,987,830 | 71,802,500 | 79,383,536 | 69,561,692 | 74,452,106 | 74,124,556 | 142,055,980                      |
| Reads kept after trimming           | 74,985,223 | 78,954,858 | 72,691,053 | 81,696,353 | 71,758,237 | 79,362,342 | 69,519,358 | 74,427,748 | 74,100,133 | 137,287,342                      |
| Percentage of discarded reads       | 0.01       | 0.02       | 0.01       | 0.02       | 0.06       | 0.03       | 0.06       | 0.03%      | 0.03       | 3.36                             |
| Average read length before trimming | 90.0       | 90.0       | 90.0       | 90.0       | 90.0       | 90.0       | 90.0       | 90.0       | 90.0       | 76.0                             |
| Average read length after trimming  | 90.0       | 90.0       | 90.0       | 90.0       | 90.0       | 90.0       | 90.0       | 90.0       | 90.0       | 75.6                             |

B=brain; L=liver; G=gonad; M=male; F=female.

**Supplementary Table S3:** Assembly and annotation statistics.

| <b>Assembly statistics</b>                   |             |
|----------------------------------------------|-------------|
| Total number of high-quality reads assembled | 814,782,647 |
| Number of contigs created                    | 177,760     |
| Number of base pairs in contigs              | 167,604,061 |
| Average length (bp)                          | 943         |
| Maximum length (bp)                          | 21,803      |
| N75                                          | 585         |
| N50                                          | 1,781       |
| N25                                          | 3,907       |
| Longest contig (bp)                          | 21,803      |

N25, N50, and N75 are defined as the length of the longest contig such that all contigs of at least that length compose at least 25, 50, and 75% of the bases of the assembly, respectively.

**Supplementary Table S4:** Over-represented protein domains in the lungfish transcriptome.

| InterPro ID | Name                                          | <i>Protopterus annectens</i> | Grubbs outlier test vs. Actinopterygii | Grubbs outlier test vs. Tetrapoda | <i>Danio rerio</i> | <i>Aspynax mexicanus</i> | <i>Lepisosteus oculatus</i> | <i>Gasterosteus aculeatus</i> | <i>Takifugu rubripes</i> | <i>Tetraodon nigroviridis</i> | <i>Oryzias latipes</i> | <i>Oreochromis niloticus</i> | <i>Oncorhynchus mykiss</i> | <i>Xenopus tropicalis</i> | <i>Anolis carolinensis</i> | <i>Pelodiscus sinensis</i> | <i>Gallus gallus</i> | <i>Taeniopygia guttata</i> | <i>Homo sapiens</i> | <i>Mus musculus</i> | <i>Ornithorhynchus anatinus</i> | <i>Monodelphis domestica</i> |
|-------------|-----------------------------------------------|------------------------------|----------------------------------------|-----------------------------------|--------------------|--------------------------|-----------------------------|-------------------------------|--------------------------|-------------------------------|------------------------|------------------------------|----------------------------|---------------------------|----------------------------|----------------------------|----------------------|----------------------------|---------------------|---------------------|---------------------------------|------------------------------|
| IPR000477   | Reverse transcriptase domain                  | 724 (588)                    | P < 0.001                              | NS                                | 43                 | 24                       | 66                          | 7                             | 35                       | 26                            | 61                     | 31                           | 259                        | 28                        | 132                        | 555                        | 35                   | 30                         | 55                  | 25                  | 17                              | 235                          |
| IPR023109   | Integrase/recombinase, N-terminal             | 380 (273)                    | P < 0.001                              | P < 0.01                          | 2                  | 0                        | 1                           | 2                             | 0                        | 1                             | 1                      | 0                            | 0                          | 159                       | 32                         | 2                          | 0                    | 0                          | 0                   | 1                   | 0                               | 0                            |
| IPR010998   | Integrase, Lambda-type, N-terminal            | 345 (250)                    | P < 0.001                              | P < 0.016                         | 2                  | 0                        | 1                           | 2                             | 0                        | 1                             | 1                      | 0                            | 0                          | 158                       | 33                         | 2                          | 0                    | 0                          | 0                   | 1                   | 0                               | 0                            |
| IPR005135   | Endonuclease/exonuclease/phosphatase          | 208 (179)                    | P = 0.037                              | NS                                | 113                | 41                       | 75                          | 53                            | 85                       | 90                            | 93                     | 50                           | 113                        | 203                       | 196                        | 197                        | 27                   | 29                         | 140                 | 97                  | 32                              | 217                          |
| IPR001909   | Krüppel-associated box                        | 166 (156)                    | P < 0.001                              | NS                                | 0                  | 0                        | 1                           | 0                             | 0                        | 0                             | 0                      | 0                            | 0                          | 52                        | 145                        | 131                        | 29                   | 2                          | 1,486               | 896                 | 38                              | 475                          |
| IPR027299   | GIY-YIG domain                                | 153 (147)                    | P < 0.001                              | P < 0.001                         | 0                  | 0                        | 0                           | 0                             | 0                        | 0                             | 0                      | 0                            | 0                          | 0                         | 0                          | 3                          | 0                    | 0                          | 0                   | 0                   | 0                               | 0                            |
| IPR000305   | GIY-YIG nuclease superfamily                  | 132 (127)                    | P < 0.001                              | P < 0.001                         | 1                  | 1                        | 1                           | 2                             | 5                        | 3                             | 3                      | 0                            | 1                          | 1                         | 1                          | 2                          | 0                    | 0                          | 6                   | 7                   | 0                               | 2                            |
| IPR013762   | Integrase-like, catalytic core                | 122 (57)                     | P < 0.001                              | P < 0.001                         | 8                  | 0                        | 3                           | 2                             | 0                        | 1                             | 1                      | 0                            | 0                          | 1                         | 0                          | 0                          | 0                    | 2                          | 0                   | 1                   | 0                               | 0                            |
| IPR004107   | Integrase, SAM-like, N-terminal               | 84 (59)                      | P < 0.001                              | P = 0.036                         | 1                  | 0                        | 0                           | 0                             | 0                        | 0                             | 0                      | 0                            | 0                          | 43                        | 7                          | 1                          | 0                    | 0                          | 0                   | 1                   | 0                               | 0                            |
| IPR011010   | DNA breaking-rejoining enzyme, catalytic core | 82 (34)                      | P < 0.001                              | P < 0.001                         | 11                 | 3                        | 6                           | 5                             | 9                        | 8                             | 4                      | 3                            | 6                          | 7                         | 3                          | 3                          | 5                    | 4                          | 15                  | 7                   | 3                               | 4                            |
| IPR002041   | Ran GTPase                                    | 77 (59)                      | P < 0.001                              | P < 0.001                         | 1                  | 1                        | 2                           | 2                             | 1                        | 1                             | 1                      | 1                            | 6                          | 3                         | 1                          | 1                          | 1                    | 3                          | 10                  | 6                   | 1                               | 2                            |

|               |                                            |            |              |              |   |   |   |   |   |   |   |   |   |   |   |     |   |   |    |   |   |   |
|---------------|--------------------------------------------|------------|--------------|--------------|---|---|---|---|---|---|---|---|---|---|---|-----|---|---|----|---|---|---|
| IPR003<br>595 | Protein-tyrosine phosphatase,<br>catalytic | 56<br>(51) | P <<br>0.001 | P <<br>0.001 | 3 | 1 | 1 | 0 | 0 | 3 | 1 | 0 | 3 | 2 | 1 | 1   | 0 | 1 | 18 | 9 | 1 | 0 |
| IPR003<br>286 | RNA-directed DNA polymerase,<br>eukaryota  | 39<br>(29) | P <<br>0.001 | NS           | 0 | 0 | 0 | 0 | 0 | 0 | 1 | 0 | 3 | 0 | 1 | 102 | 5 | 0 | 0  | 0 | 0 | 0 |
| IPR006<br>687 | Small GTPase superfamily,<br>SAR1-type     | 27<br>(19) | P <<br>0.001 | P = NS       | 4 | 2 | 2 | 4 | 3 | 2 | 3 | 3 | 6 | 2 | 2 | 2   | 3 | 3 | 15 | 6 | 2 | 3 |

Over-represented InterPro protein domains detected by comparing 9 Actinopterygii and 9 tetrapod genomes. InterPro annotations for each species were retrieved from the InterPro: protein sequence analysis and classification database (<http://www.ebi.ac.uk/interpro/>). A p-value < 0.05 in a Grubbs test for outliers was considered a significant indication of expansion of protein families characterized by a given InterPro domain. For *P. annectens*, both the raw number of *de novo* assembled contigs and the number of non-redundant contigs based on a CD-HIT 75 % identity threshold (in brackets) are indicated. Grubbs test was performed using non-redundant sequence count. NS = not significant.

**Supplementary Table S5 : Rate of molecular evolution.**

| Ingroup1               | Ingroup2            | Outgroup           | Identical | Divergent | Ingroup1_specific | Ingroup2 specific | Outgroup specific | CHI^2_test | p-value | Slow                |
|------------------------|---------------------|--------------------|-----------|-----------|-------------------|-------------------|-------------------|------------|---------|---------------------|
| <i>M. musculus</i>     | <i>P. annectens</i> | <i>C. milii</i>    | 46553     | 2637      | 3648              | 3158              | 3905              | 35.28      | 0.00000 | <i>P. annectens</i> |
| <i>M. musculus</i>     | <i>P. annectens</i> | <i>L. erinacea</i> | 46351     | 2763      | 3657              | 3023              | 4107              | 60.17      | 0.00000 | <i>P. annectens</i> |
| <i>M. musculus</i>     | <i>P. annectens</i> | <i>S. canicula</i> | 46603     | 2576      | 3712              | 3155              | 3855              | 45.18      | 0.00000 | <i>P. annectens</i> |
| <i>L. africana</i>     | <i>P. annectens</i> | <i>C. milii</i>    | 46473     | 2600      | 3716              | 3167              | 3933              | 43.79      | 0.00000 | <i>P. annectens</i> |
| <i>L. africana</i>     | <i>P. annectens</i> | <i>L. erinacea</i> | 46257     | 2700      | 3739              | 3044              | 4149              | 71.21      | 0.00000 | <i>P. annectens</i> |
| <i>L. africana</i>     | <i>P. annectens</i> | <i>S. canicula</i> | 46498     | 2542      | 3805              | 3136              | 3908              | 64.48      | 0.00000 | <i>P. annectens</i> |
| <i>M. domestica</i>    | <i>P. annectens</i> | <i>C. milii</i>    | 46654     | 2603      | 3547              | 3161              | 3936              | 22.21      | 0.00000 | <i>P. annectens</i> |
| <i>M. domestica</i>    | <i>P. annectens</i> | <i>L. erinacea</i> | 46457     | 2708      | 3551              | 3052              | 4133              | 37.71      | 0.00000 | <i>P. annectens</i> |
| <i>M. domestica</i>    | <i>P. annectens</i> | <i>S. canicula</i> | 46710     | 2563      | 3605              | 3143              | 3880              | 31.63      | 0.00000 | <i>P. annectens</i> |
| <i>P. sinensis</i>     | <i>P. annectens</i> | <i>C. milii</i>    | 47102     | 2419      | 3095              | 3153              | 4127              | 0.54       | 0.46309 | NS                  |
| <i>P. sinensis</i>     | <i>P. annectens</i> | <i>L. erinacea</i> | 46895     | 2497      | 3109              | 3079              | 4334              | 0.15       | 0.70293 | NS                  |
| <i>P. sinensis</i>     | <i>P. annectens</i> | <i>S. canicula</i> | 47179     | 2400      | 3132              | 3135              | 4050              | 0.00       | 0.96977 | NS                  |
| <i>A. carolinensis</i> | <i>P. annectens</i> | <i>C. milii</i>    | 46518     | 2560      | 3683              | 3090              | 4050              | 51.92      | 0.00000 | <i>P. annectens</i> |
| <i>A. carolinensis</i> | <i>P. annectens</i> | <i>L. erinacea</i> | 46373     | 2653      | 3635              | 3045              | 4195              | 52.11      | 0.00000 | <i>P. annectens</i> |
| <i>A. carolinensis</i> | <i>P. annectens</i> | <i>S. canicula</i> | 46666     | 2561      | 3649              | 3123              | 3902              | 40.86      | 0.00000 | <i>P. annectens</i> |
| <i>G. gallus</i>       | <i>P. annectens</i> | <i>C. milii</i>    | 47144     | 2425      | 3057              | 3157              | 4118              | 1.61       | 0.20459 | NS                  |
| <i>G. gallus</i>       | <i>P. annectens</i> | <i>L. erinacea</i> | 46954     | 2530      | 3054              | 3055              | 4308              | 0.00       | 0.98979 | NS                  |
| <i>G. gallus</i>       | <i>P. annectens</i> | <i>S. canicula</i> | 47251     | 2390      | 3064              | 3185              | 4011              | 2.34       | 0.12585 | NS                  |
| <i>X. tropicalis</i>   | <i>P. annectens</i> | <i>C. milii</i>    | 45916     | 2677      | 4284              | 3113              | 3910              | 185.38     | 0.00000 | <i>P. annectens</i> |
| <i>X. tropicalis</i>   | <i>P. annectens</i> | <i>L. erinacea</i> | 45739     | 2783      | 4268              | 3023              | 4087              | 212.59     | 0.00000 | <i>P. annectens</i> |
| <i>X. tropicalis</i>   | <i>P. annectens</i> | <i>S. canicula</i> | 45983     | 2663      | 4331              | 3080              | 3843              | 211.17     | 0.00000 | <i>P. annectens</i> |
| <i>H. chinensis</i>    | <i>P. annectens</i> | <i>C. milii</i>    | 47011     | 2421      | 3190              | 3163              | 4116              | 0.11       | 0.73480 | NS                  |
| <i>H. chinensis</i>    | <i>P. annectens</i> | <i>L. erinacea</i> | 46844     | 2505      | 3164              | 3105              | 4283              | 0.56       | 0.45617 | NS                  |
| <i>H. chinensis</i>    | <i>P. annectens</i> | <i>S. canicula</i> | 47140     | 2417      | 3175              | 3182              | 3987              | 0.01       | 0.93004 | NS                  |
| <i>L. chalumnae</i>    | <i>P. annectens</i> | <i>C. milii</i>    | 47008     | 2265      | 3193              | 3290              | 4145              | 1.45       | 0.22831 | NS                  |
| <i>L. chalumnae</i>    | <i>P. annectens</i> | <i>L. erinacea</i> | 46820     | 2392      | 3188              | 3168              | 4333              | 0.06       | 0.80192 | NS                  |

|                        |                     |                    |       |      |      |      |      |        |         |                     |
|------------------------|---------------------|--------------------|-------|------|------|------|------|--------|---------|---------------------|
| <i>L. chalumnae</i>    | <i>P. annectens</i> | <i>S. canicula</i> | 47135 | 2277 | 3180 | 3291 | 4018 | 1.90   | 0.16763 | NS                  |
| <i>D. rerio</i>        | <i>P. annectens</i> | <i>C. milii</i>    | 45875 | 2883 | 4326 | 3156 | 3661 | 182.96 | 0.0000  | <i>P. annectens</i> |
| <i>D. rerio</i>        | <i>P. annectens</i> | <i>L. erinacea</i> | 45667 | 2927 | 4341 | 3097 | 3867 | 208.06 | 0.0000  | <i>P. annectens</i> |
| <i>D. rerio</i>        | <i>P. annectens</i> | <i>S. canicula</i> | 45946 | 2804 | 4369 | 3192 | 3590 | 183.22 | 0.0000  | <i>P. annectens</i> |
| <i>T. nigroviridis</i> | <i>P. annectens</i> | <i>C. milii</i>    | 44942 | 3096 | 5252 | 3044 | 3560 | 587.66 | 0.00000 | <i>P. annectens</i> |
| <i>T. nigroviridis</i> | <i>P. annectens</i> | <i>L. erinacea</i> | 44812 | 3214 | 5189 | 2989 | 3690 | 591.83 | 0.00000 | <i>P. annectens</i> |
| <i>T. nigroviridis</i> | <i>P. annectens</i> | <i>S. canicula</i> | 45032 | 3065 | 5276 | 3051 | 3470 | 594.53 | 0.00000 | <i>P. annectens</i> |
| <i>L. oculatus</i>     | <i>P. annectens</i> | <i>C. milii</i>    | 46686 | 2538 | 3515 | 3346 | 3815 | 5.16   | 0.04132 | <i>P. annectens</i> |
| <i>L. oculatus</i>     | <i>P. annectens</i> | <i>L. erinacea</i> | 46450 | 2595 | 3558 | 3246 | 4051 | 14.31  | 0.00016 | <i>P. annectens</i> |
| <i>L. oculatus</i>     | <i>P. annectens</i> | <i>S. canicula</i> | 46779 | 2513 | 3535 | 3351 | 3722 | 4.92   | 0.02660 | <i>P. annectens</i> |
| <i>C. milii</i>        | <i>P. annectens</i> | <i>P. marinus</i>  | 41473 | 3895 | 2856 | 2949 | 8727 | 1.49   | 0.22223 | NS                  |
| <i>L. erinacea</i>     | <i>P. annectens</i> | <i>P. marinus</i>  | 41362 | 4022 | 2967 | 2904 | 8645 | 0.68   | 0.41096 | NS                  |
| <i>S. canicula</i>     | <i>P. annectens</i> | <i>P. marinus</i>  | 41531 | 3861 | 2798 | 2927 | 8783 | 2.91   | 0.08821 | NS                  |

NS= not significant



**Supplementary Table S6:**  $\omega$  ratio of genes involved in purine catabolism between *P. annectens* and other vertebrate sequences.

|                       | <i>UOX</i> | <i>HIUase</i> | <i>PRHOXNB</i> | <i>ALN</i> | <i>ALC</i> |
|-----------------------|------------|---------------|----------------|------------|------------|
| <i>D. rerio</i>       | 0.05       | 0.11          | 0.07           | 0.09       | 0.07       |
| <i>T. rubripes</i>    | 0.04       | 0.14          | 0.11           | 0.11       | 0.11       |
| <i>L. menadoensis</i> | 0.07       | 0.12          | 0.07           | 0.12       | 0.14       |
| <i>X. tropicalis</i>  | 0.06       | 0.16          | 0.09           | 0.10       | 0.11       |
| <i>O. anatinus</i>    | 0.06       | 0.12          | 0.11           | 0.13       | 0.10       |
| <i>M. musculus</i>    | 0.06       | 0.10          | 0.12           | -          | 0.09       |

**Supplementary Table S7:** The 30 most abundant InterPro domains detected by InterProScan in the *de novo* assembled lungfish transcriptome.

| <b>InterPro ID</b> | <b>Description</b>                                                 | <b>No. of contigs detected</b> |
|--------------------|--------------------------------------------------------------------|--------------------------------|
| IPR027417          | P-loop containing nucleoside triphosphate hydrolase                | 919                            |
| IPR007087          | Zinc finger, C2H2                                                  | 787                            |
| IPR013783          | Immunoglobulin-like fold                                           | 767                            |
| IPR015880          | Zinc finger, C2H2-like                                             | 730                            |
| IPR000477          | Reverse transcriptase domain                                       | 724                            |
| IPR013087          | Zinc finger C2H2-type/integrase DNA-binding domain                 | 702                            |
| IPR011009          | Protein kinase-like domain                                         | 523                            |
| IPR007110          | Immunoglobulin-like domain                                         | 472                            |
| IPR000719          | Protein kinase domain                                              | 470                            |
| IPR013083          | Zinc finger, RING/FYVE/PHD-type                                    | 462                            |
| IPR023109          | Integrase/recombinase, N-terminal                                  | 380                            |
| IPR011993          | Pleckstrin homology-like domain                                    | 364                            |
| IPR015943          | WD40/YVTN repeat-like-containing domain                            | 346                            |
| IPR010998          | Integrase, Lambda-type, N-terminal                                 | 345                            |
| IPR016024          | Armadillo-type fold                                                | 336                            |
| IPR003599          | Immunoglobulin subtype                                             | 335                            |
| IPR002290          | Serine/threonine/dual specificity protein kinase, catalytic domain | 329                            |
| IPR017441          | Protein kinase, ATP binding site                                   | 326                            |
| IPR017986          | WD40-repeat-containing domain                                      | 296                            |
| IPR001841          | Zinc finger, RING-type                                             | 284                            |
| IPR008271          | Serine/threonine-protein kinase, active site                       | 282                            |
| IPR017452          | GPCR, rhodopsin-like, 7TM                                          | 277                            |
| IPR001680          | WD40 repeat                                                        | 272                            |
| IPR000276          | G protein-coupled receptor, rhodopsin-like                         | 270                            |
| IPR008985          | Concanavalin A-like lectin/glucanases superfamily                  | 270                            |
| IPR001849          | Pleckstrin homology domain                                         | 242                            |
| IPR012677          | Nucleotide-binding, alpha-beta plait                               | 232                            |
| IPR011989          | Armadillo-like helical                                             | 230                            |
| IPR005135          | Endonuclease/exonuclease/phosphatase                               | 207                            |
| IPR003961          | Proteins matched: Fibronectin, type III                            | 206                            |

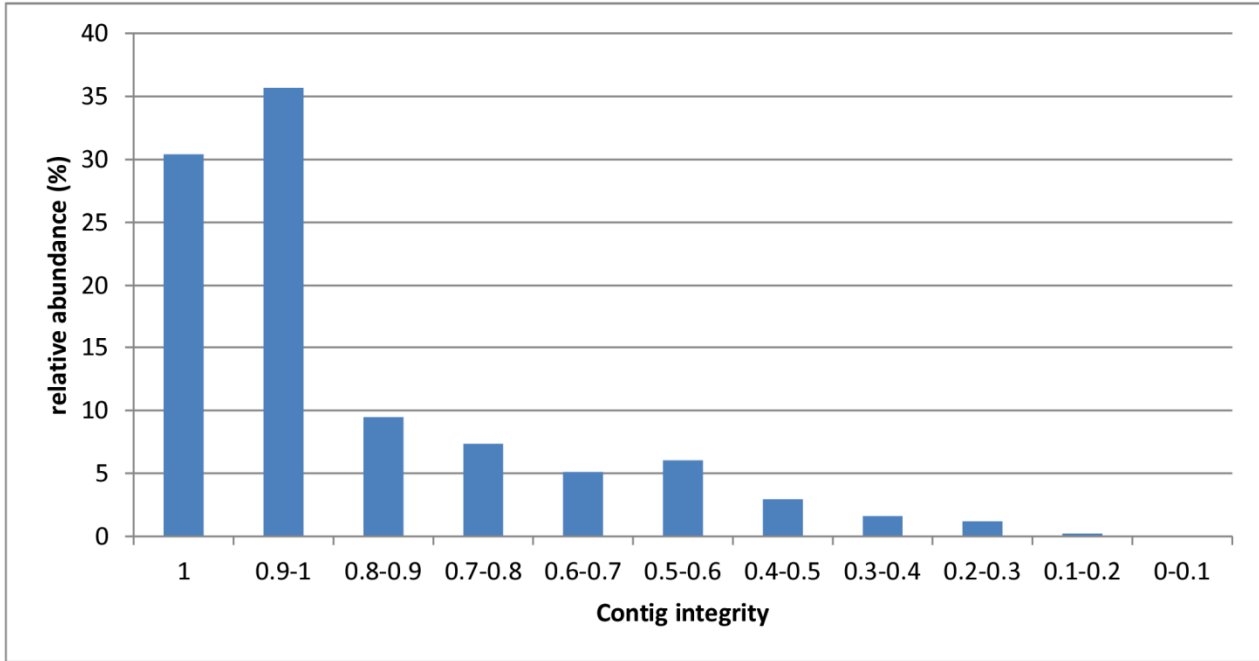

**Supplementary Fig. S1: Protein-coding transcript integrity based on Ortholog Hit Ratio analysis.** X axis: values approaching 1 indicate transcript integrity. Y axis: values represent the abundance of each integrity class relative to the complete transcriptome.

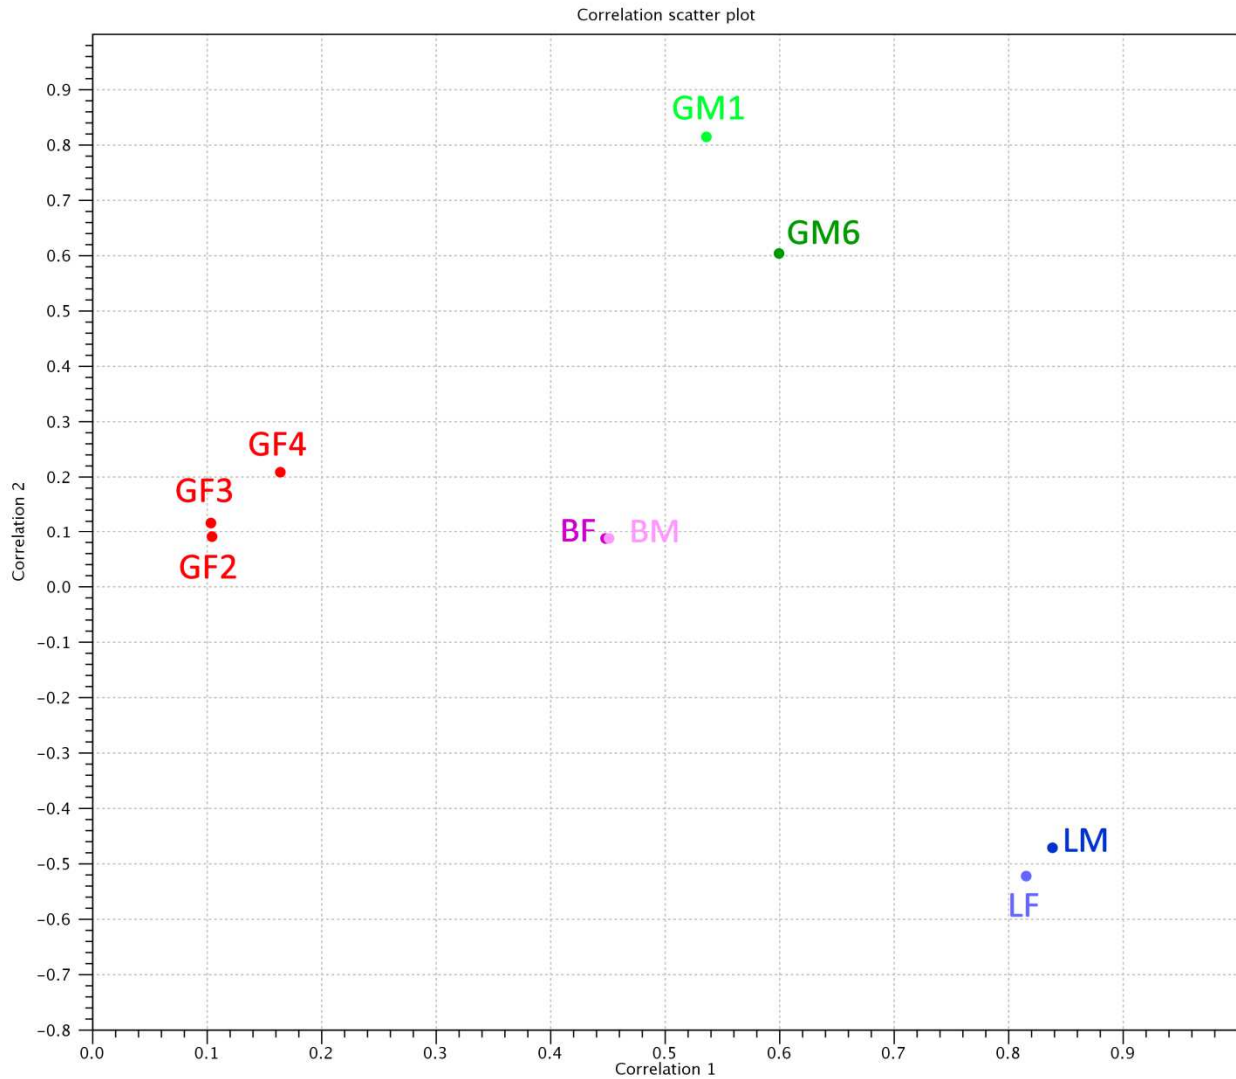

**Supplementary Fig. S2: PCA showing the relationship between the gene expression profiles of the 9 lungfish samples analysed by RNA-seq.** Square root-transformed TPM values of all transcripts were used to calculate the two eigenvectors, with the largest and second-largest eigenvalue plotted on the X and Y axes, respectively.

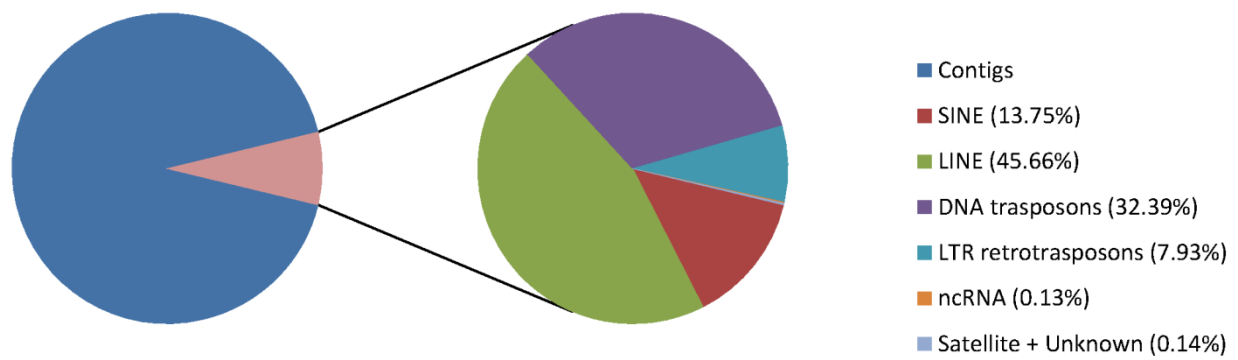

**Supplementary Fig. S3: Results of RepeatMasker scan of assembled lungfish contigs.** SINEs, LINEs, Class II (DNA transposons), ncRNAs (tRNAs, srpRNAs, snRNAs, 7SK RNAs), LTRs, satellite and unknown elements.

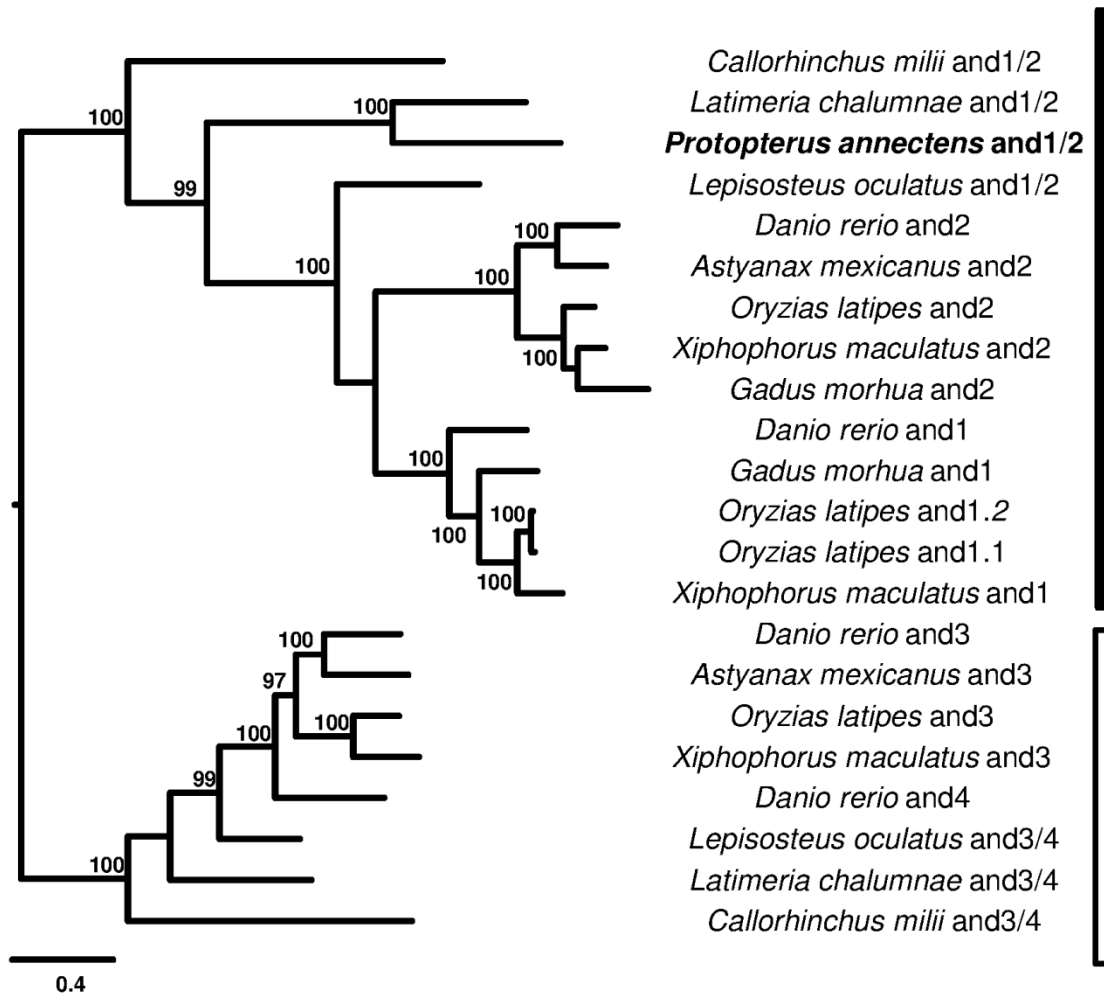

**Supplementary Fig. S4: *And* gene family tree.** Bayesian Inference performed with MrBayes (generations: 1,000,000; sampling: 100; substitution model: Wag; stationarity defined as the point where the average standard deviation of split frequencies reaches a value < 0.005). Black box: And1/2; white box: And3/4. Numbers on nodes represent posterior probability. The accession numbers of the aligned sequences are reported in Supplementary Data S2.

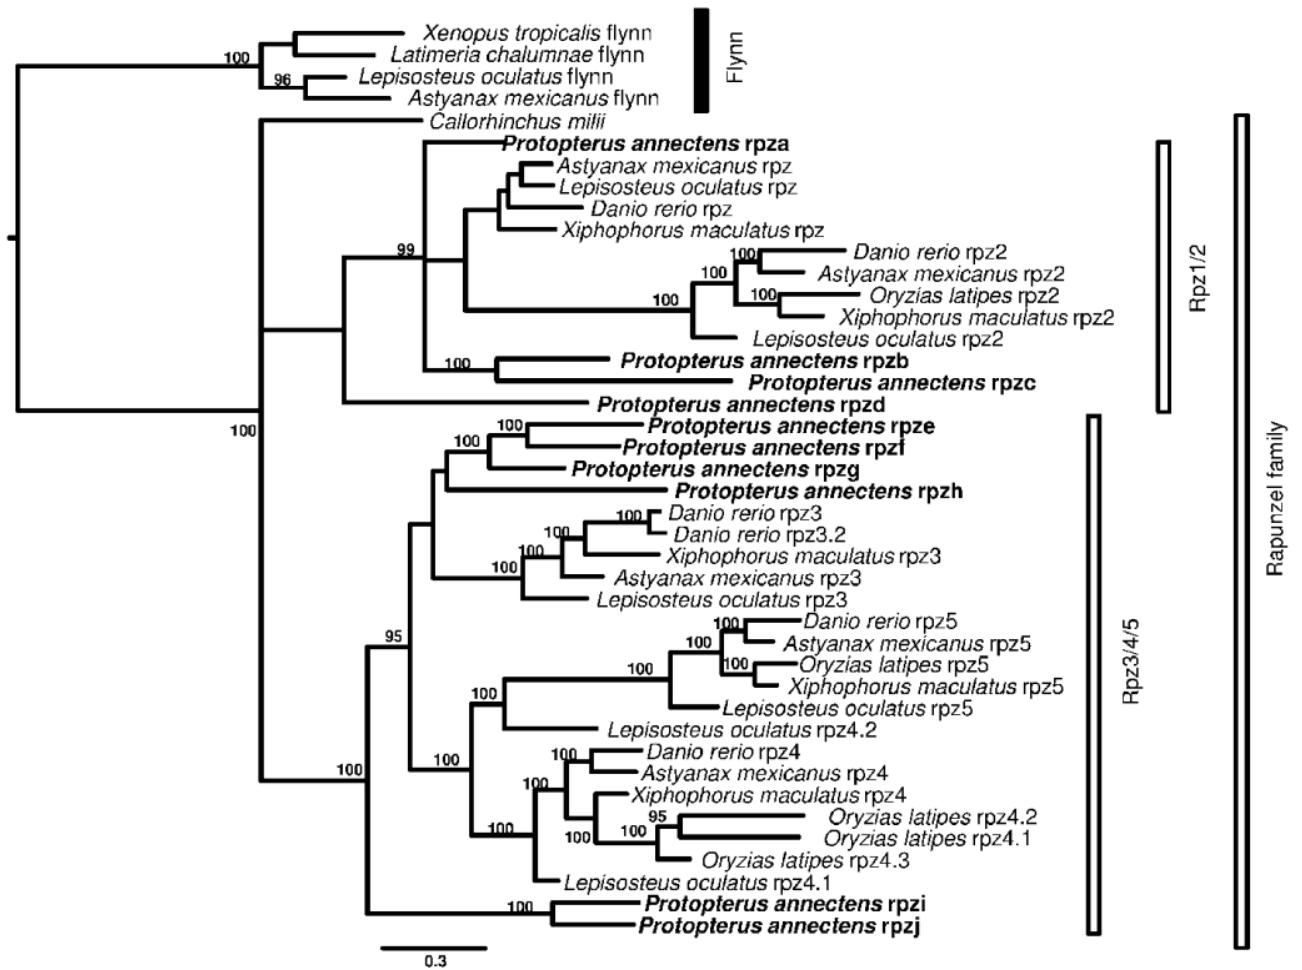

**Supplementary Fig. S5: Rpz gene family tree.** Bayesian Inference performed with MrBayes (generations: 1,000,000; sampling: 100; substitution model: Jones; stationarity defined as the point where the average standard deviation of split frequencies reaches a value < 0.006). Numbers on nodes represent posterior probability. The accession numbers of the aligned sequences are reported in Supplementary Data S2. Sequences evolutionarily related to the *rpz* family were named '*flynn*' and used as outgroups. White boxes: *rpz* family members; black box: *flynn* genes.

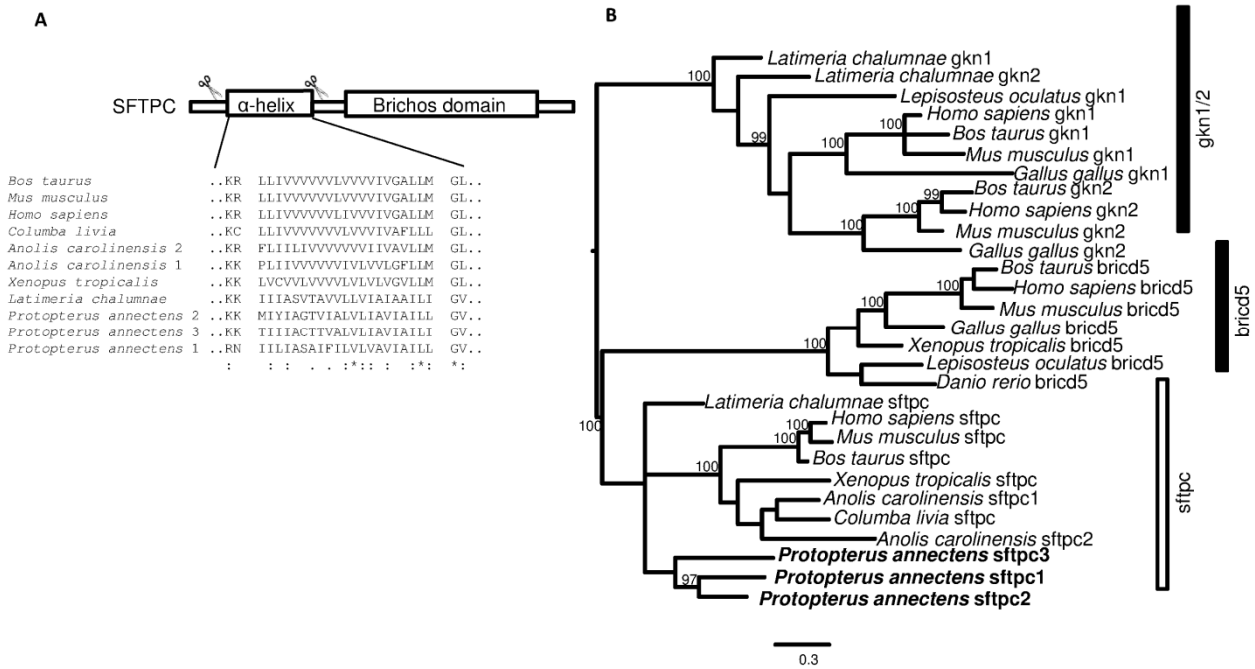

**Supplementary Fig. S6: SFTPC sequence attribution.** A) Multiple alignment of SFTPC  $\alpha$ -helix region. B) Sftpc, bricd5, and gkn1/2 tree. Bayesian Inference performed with MrBayes (generations: 1,000,000; sampling: 100; substitution model: Jones + Wag; stationarity defined as the point where the average standard deviation of split frequencies reaches values  $< 0.005$ ). Numbers on nodes represent posterior probability. The accession numbers of the aligned sequences are reported in Supplementary Data S2. White box: SFTPC members; black boxes: bricd5 and gkn1/2 sequences.



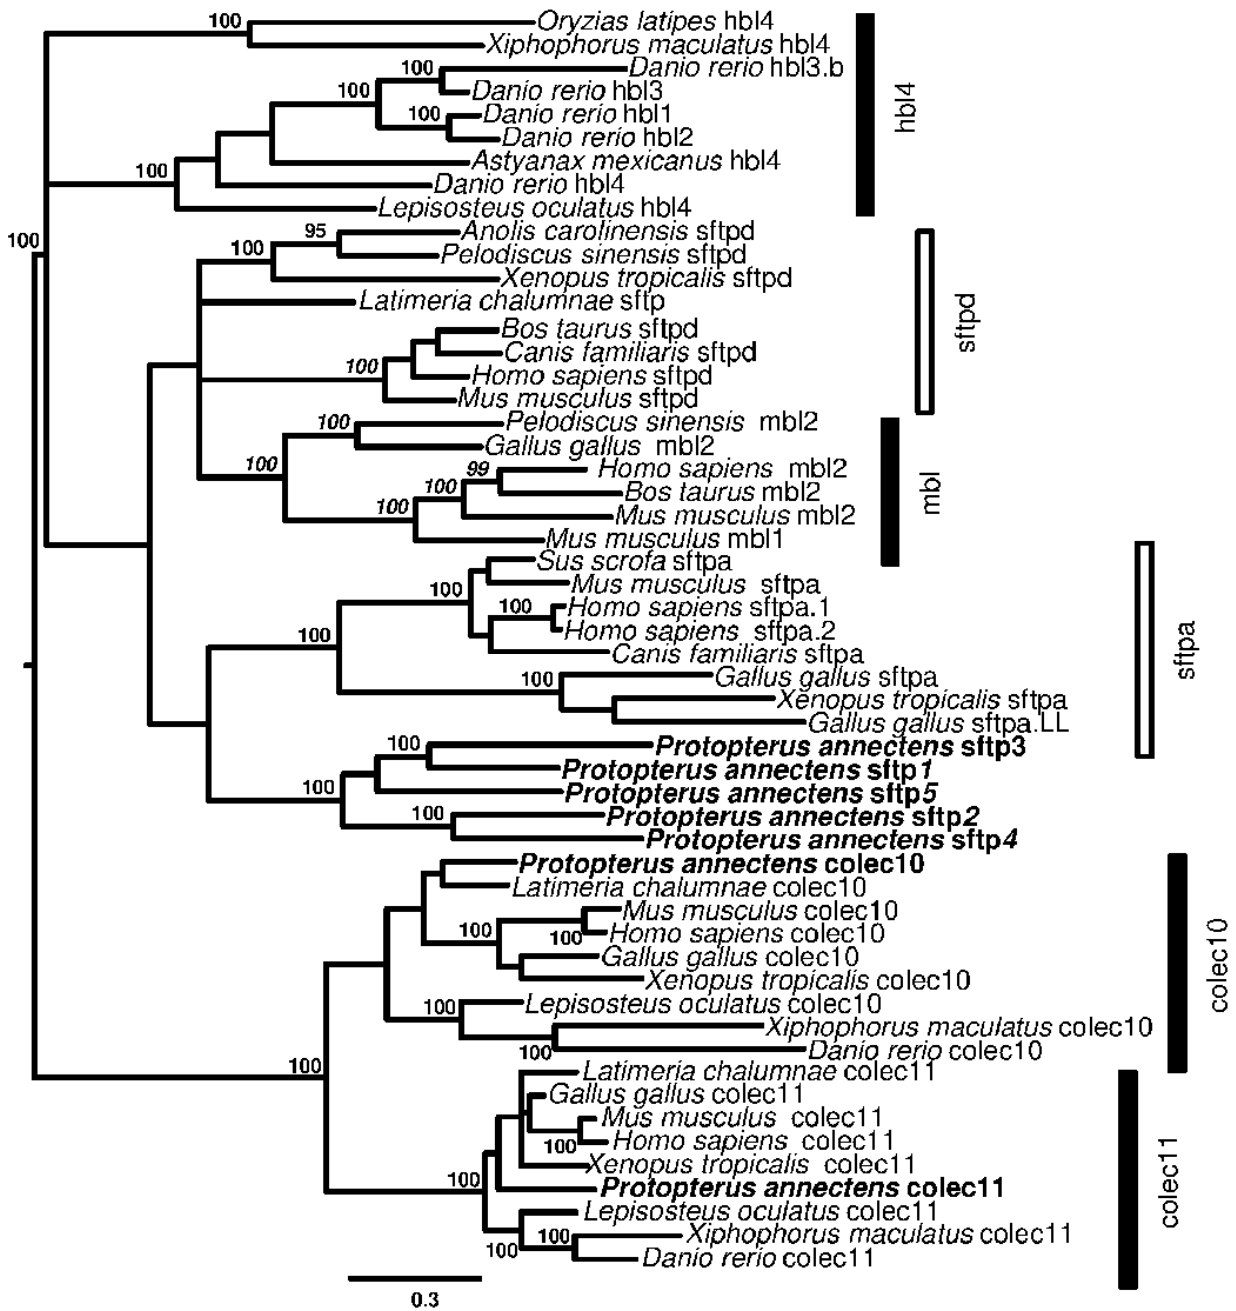

**Supplementary Fig. S7: Phylogeny of SFTP/D/MBL sequences.** Bayesian Inference performed with MrBayes (generations: 5,000,000; sampling: 100; substitution model: Wag; stationarity defined as the point where the average standard deviation of split frequencies reaches a value < 0.009). Numbers on nodes represent posterior probability. The accession numbers of the aligned sequences are reported in Supplementary Data S2. White boxes: SFTP and SFTPD members; black boxes: MBL, HBL4, and COLEC10/11 sequences.

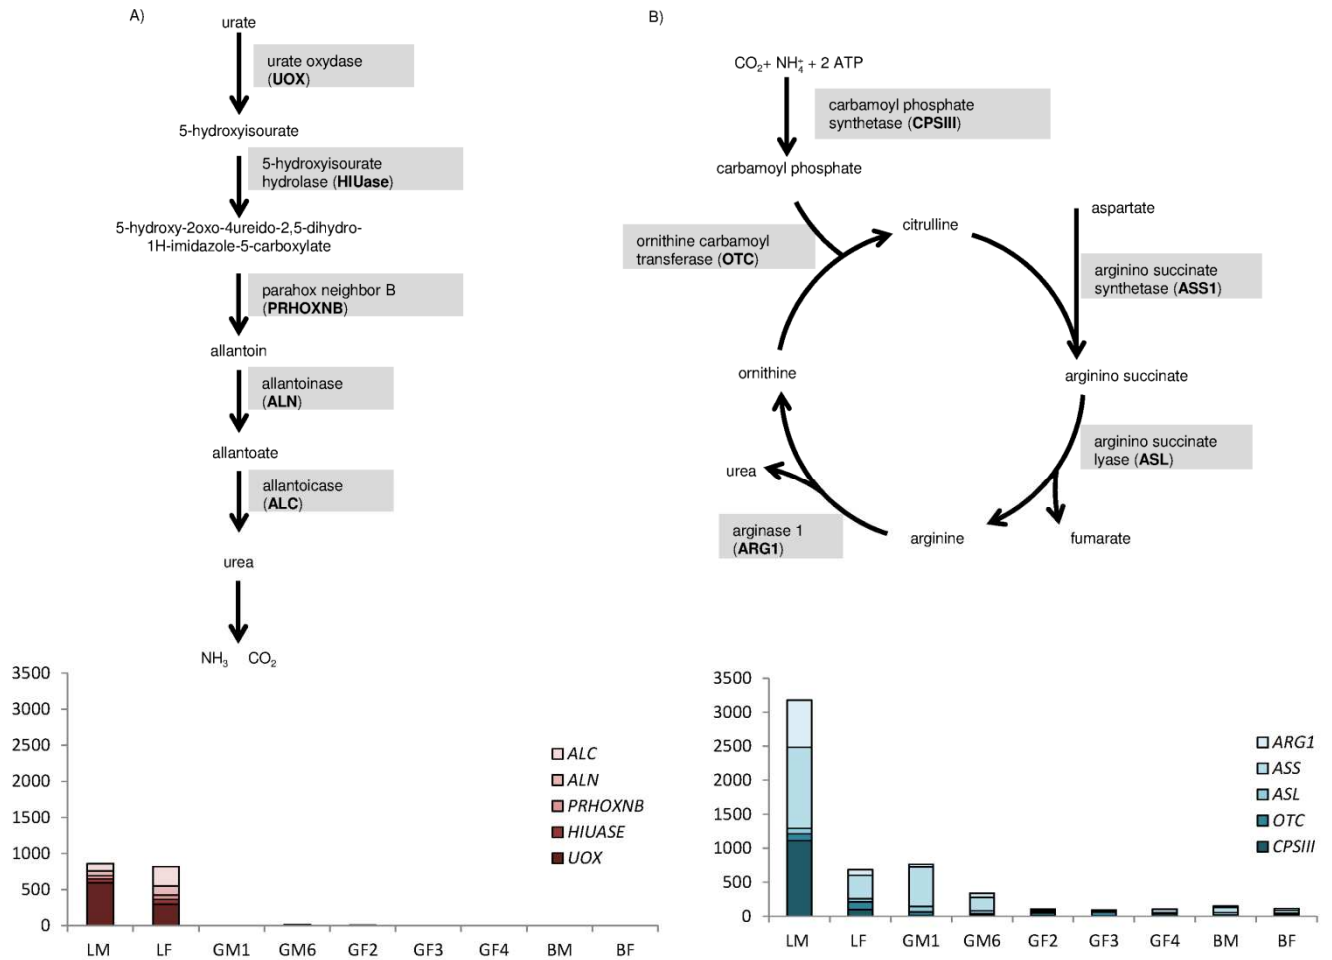

**Supplementary Fig. S8: Urea pathways: A) purine catabolism; B) Urea cycle.** Histograms showing the expression levels of the genes involved in each pattern in the tissues analysed. Values expressed as TPMs. Expression analysis confirmed the tissue-specificity of the genes involved in purine catabolism. Some genes involved in the urea cycle are expressed both in liver and in the male gonad.

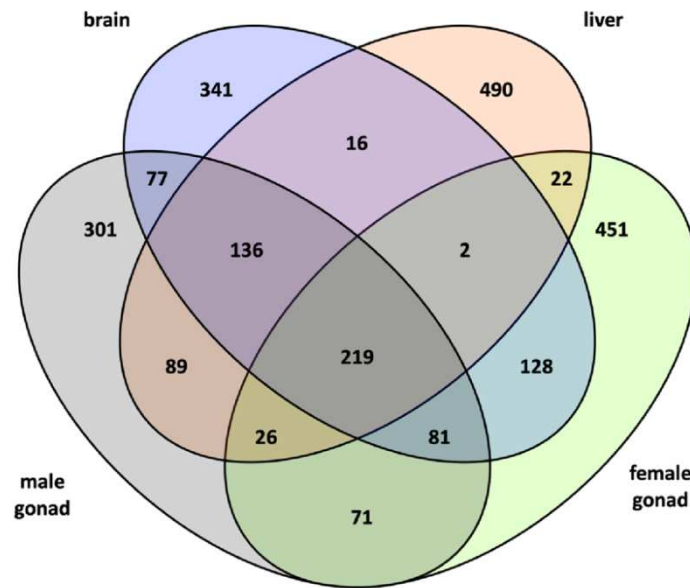

**Supplementary Fig. S9: Venn diagram depicting the overlap of tissue transcriptomes assessed in the 1,000 most highly expressed transcripts in each tissue type.** Whereas over 200 transcripts, serving fundamental housekeeping functions, are shared, female gonad and liver tissue appear to express a higher number of tissue-specific genes.

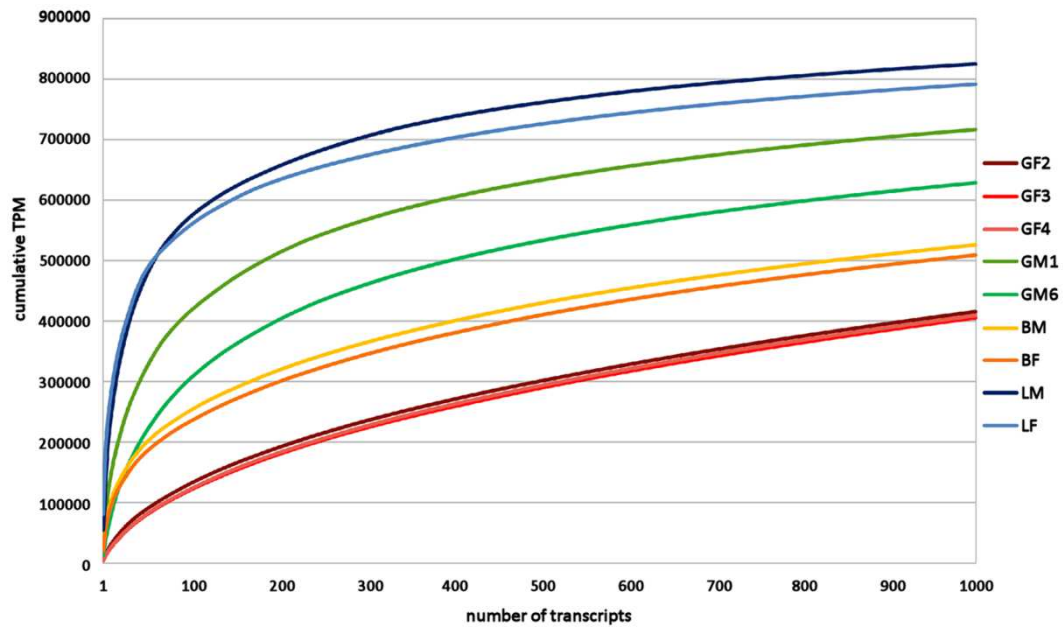

**Supplementary Fig. S10: Transcriptome richness of *P. annectens* tissues.** Data are shown as cumulative TPM values of the 1,000 most highly expressed transcripts in each tissue type. The 1,000 most highly expressed genes in female gonad account for 40% of all transcripts, indicating its richness in terms of number of genes expressed. Brain, male gonad, and liver tissue show a lower transcriptome richness.
